# Supplementary material
Source: MDPI journal article supplement (https://www.mdpi.com/2624-5175/7/1/4)
Supplement: s1 [file s1=3fversion=3d1738058820]

## Sheet: Data for Feasibility Paper
Dataset ID	age_exact	chronotype	condition	Chronomatch	Completed	Howfar	V1alternateDLMO	V2alternateDLMO	V3alternateDLMO	PS1_Onset	PS1_Offset	PS1_Mid	PS1_Eff	PS1_Dur	PS1_Num	DL1_Onset	DL1_Offset	DL1_Mid	DL1_Eff	SR_Onset	SR_Offset	SR_Mid	SR_Eff	SR_Dur	SR_Num	PS2_Onset	PS2_Offset	PS2_Mid	PS2_Eff	PS2_Num	DL2_Onset	DL2_Offset	DL2_Mid	DL2_Eff	PS3_Onset	PS3_Offset	PS3_Mid	PS3_Eff	SE_Onset	SE_Offset	SE_Mid	SE_Eff	SE_Dur	SE_Num	TeenGender	TeenEthnicity	TeenRace	Misalignment
1	17.3534	L	L	0	1	3	-3.37838	-3.70276	-3.17906	22.5417	6.54167	2.55	82.77	8	2	26.35	7.7	5.03333	87.54	24.6	7.71667	4.16667	86.89	7.11667	1	#NULL!	#NULL!	#NULL!	#NULL!	0	26.0667	8.01667	5.05	89.08	22.65	6.56667	5.05	84.63	24.48	9.15333	4.82667	75.084	8.67333	5	2	1	3	2.07735
2	17.4219	L		#NULL!	0	1	-0.510204	#NULL!	#NULL!	28.27	12.3	8.29	80.738	8.03	5	#NULL!	#NULL!	#NULL!	#NULL!	#NULL!	#NULL!	#NULL!	#NULL!	#NULL!	#NULL!	#NULL!	#NULL!	#NULL!	#NULL!	#NULL!	#NULL!	#NULL!	#NULL!	#NULL!	#NULL!	#NULL!	#NULL!	#NULL!	#NULL!	#NULL!	#NULL!	#NULL!	#NULL!	#NULL!	2	1	3	#NULL!
3	15.1562	O	E	0	1	3	-0.778037	-1.18796	-2.69968	25.3933	10.56	5.98667	89.808	9.16667	5	27.6667	9.55	6.61667	88.89	24.9417	6.97083	3.96667	90.7025	6.02917	4	26.55	11.6583	7.11667	85.09	2	28.4167	10.6667	7.55	98.93	25.3667	8.73333	7.55	97.29	22.5133	7.24	2.88667	82.414	8.72667	5	2	1	6	1.17836
4	16.4164	O	L	1	1	3	-0.384202	-1.23565	-0.898665	#NULL!	#NULL!	#NULL!	#NULL!	#NULL!	0	27.4833	10.0333	6.76667	88.8	25.0292	7.8875	4.46667	82.045	6.85833	4	25.9333	9.825	5.89167	75.585	2	27.2667	9.45	6.36667	85.64	24.8167	8.41667	6.36667	78.85	25.3933	9.88333	5.65	70.954	8.49	5	1	1	5	#NULL!
5	15.5096	L		#NULL!	0	1	-0.931542	#NULL!	#NULL!	25.475	8.31389	4.90556	89.205	6.83889	6	#NULL!	#NULL!	#NULL!	#NULL!	#NULL!	#NULL!	#NULL!	#NULL!	#NULL!	#NULL!	#NULL!	#NULL!	#NULL!	#NULL!	#NULL!	#NULL!	#NULL!	#NULL!	#NULL!	#NULL!	#NULL!	#NULL!	#NULL!	#NULL!	#NULL!	#NULL!	#NULL!	#NULL!	#NULL!	1	1	3	#NULL!
6	16.4219	L	E	1	1	3	-1.41389	-2.76508	-2.95276	24.2583	8.09444	4.18333	93.4783	7.83611	6	26.2167	7.96667	5.1	93.33	24.6042	6.96667	3.79583	96.7425	6.3625	4	23.1667	6.96667	3.075	94.55	2	25.9833	7.95	4.96667	89.94	24.3167	6.96667	4.96667	95.49	21.6056	6.97778	2.30556	93.5767	9.37222	3	2	0	5	0.338902
7	16.8548	L	L	0	0	2	-2.83602	-2.56303	#NULL!	22.9611	6.85556	2.91944	87.83	7.89444	6	26.0833	8.05	5.08333	86.31	24.6125	6.94167	3.7875	91.21	6.32917	4	23.8	7.13333	3.475	94.785	2	#NULL!	#NULL!	#NULL!	#NULL!	#NULL!	#NULL!	#NULL!	#NULL!	#NULL!	#NULL!	#NULL!	#NULL!	#NULL!	#NULL!	2	1	5	#NULL!
8	18.1178	O	E	0	0	2	-0.969734	-1.06857	#NULL!	25.3125	8.65	4.9875	93.4675	7.3375	4	27.75	8.88333	6.31667	92.21	23.3833	7.85	3.61667	100	8.46667	1	#NULL!	#NULL!	#NULL!	#NULL!	#NULL!	#NULL!	#NULL!	#NULL!	#NULL!	#NULL!	#NULL!	#NULL!	#NULL!	#NULL!	#NULL!	#NULL!	#NULL!	#NULL!	#NULL!	1	1	5	#NULL!
9	15.9671	O	E	0	1	3	-0.205155	-0.656015	-0.54	25.0556	9.81667	5.44444	94.1817	8.76111	6	27.25	9.46667	6.36667	93.03	24.5958	7.67917	4.15	95.3425	7.08333	4	25.8417	9.71667	5.79167	94.185	2	27.2333	9.58333	6.41667	97.89	24.7833	8.46667	6.41667	98.7	21.5667	7.45	2.51667	93.25	9.88333	1	1	1	5	2.59293
10	14.9233	O	L	1	0	2	2.44928	1.07761	#NULL!	26.0933	10.3767	6.24667	90.096	8.28333	5	28.4667	12.65	8.56667	91.65	25.7792	8.00417	4.9	93.1225	6.225	4	25.5583	10.3167	5.94167	95.65	2	#NULL!	#NULL!	#NULL!	#NULL!	#NULL!	#NULL!	#NULL!	#NULL!	28.2	13.15	8.68333	74.565	8.95	2	1	#NULL!	5	#NULL!
11	14.2959	O	E	0	1	3	1.35839	#NULL!	-2.27445	26.8472	11.1889	7.02778	80.765	8.34167	6	25.6333	7.6	4.63333	95.8	27.0417	10.3625	6.70833	80.44	7.32083	4	27.625	10.5667	7.10833	74	2	22.3333	8.26667	3.3	68.96	22.3333	7	3.3	89.04	23.1167	8.83333	3.98333	83.11	9.71667	3	2	1	3	0.588395
12	18.1452	O	L	1	0	2	-0.945455	0.526423	#NULL!	27.775	11.1292	7.46667	78.3725	7.35417	4	29.9667	12.4167	9.2	66.93	26.5222	12.0111	7.27222	72.9767	9.48889	3	#NULL!	#NULL!	#NULL!	#NULL!	#NULL!	#NULL!	#NULL!	#NULL!	#NULL!	#NULL!	#NULL!	#NULL!	#NULL!	22.7083	6.69167	2.70833	93.39	7.98333	2	2	1	5	#NULL!
13	14.9781	L	E	1	1	3	-1.604	-1.09474	-0.54425	24.0833	7.40833	3.75278	92.7917	7.325	6	24.5	7.2	3.85	96.27	23.8583	6.94167	3.40417	92.3275	7.08333	4	24.3167	7.2	3.76667	94.445	2	22.7167	6.96667	2.85	86.06	22.3167	6.96667	2.85	85.55	22.8	7.39444	3.10556	91.1667	8.59444	3	2	1	5	1.70697
14	17.4192	L	L	0	0	2	-2.91429	-3.08167	#NULL!	23.7361	7.20556	3.48056	90.1217	7.46944	6	24.1333	6.11667	3.13333	93.31	23.7417	7.00833	3.3875	93.5775	7.26667	4	#NULL!	#NULL!	#NULL!	#NULL!	#NULL!	#NULL!	#NULL!	#NULL!	#NULL!	#NULL!	#NULL!	#NULL!	#NULL!	23.3333	7	3.16667	79.985	7.66667	2	2	1	5	#NULL!
15	15.5507	L	L	0	1	3	-1.84141	-1.5523	0.755556	23.3722	6.86944	3.12778	86.15	7.49722	6	#NULL!	#NULL!	#NULL!	#NULL!	#NULL!	#NULL!	#NULL!	#NULL!	#NULL!	0	25.2833	8.80833	5.05833	80.295	2	#NULL!	#NULL!	#NULL!	#NULL!	24.8333	10.1	#NULL!	83.45	26.25	10.99	6.63	85.482	8.74	5	1	1	5	0.905257
16	15.1863	O	E	0	1	3	1.84796	-1.20598	-0.568182	28.6889	11.9361	8.31944	96.63	7.24722	6	25.7167	7.13333	4.43333	97.85	25.5917	7.77917	4.69583	93.865	6.1875	4	26.6583	9.04167	5.85833	97.265	2	24.15	6.96667	3.56667	96.82	26.0167	7.06667	3.56667	99.01	26.65	7.08333	4.88333	95.8	4.43333	1	2	0	5	1.01997
17	#NULL!			#NULL!	#NULL!	#NULL!	#NULL!	#NULL!	#NULL!	#NULL!	#NULL!	#NULL!	#NULL!	#NULL!	#NULL!	#NULL!	#NULL!	#NULL!	#NULL!	#NULL!	#NULL!	#NULL!	#NULL!	#NULL!	#NULL!	#NULL!	#NULL!	#NULL!	#NULL!	#NULL!	#NULL!	#NULL!	#NULL!	#NULL!	#NULL!	#NULL!	#NULL!	#NULL!	#NULL!	#NULL!	#NULL!	#NULL!	#NULL!	#NULL!	#NULL!	#NULL!	#NULL!	#NULL!
18	15.8849	L	E	1	1	3	-3.88041	-3.84783	-4.177	23.0417	6.92778	2.99722	66.9817	7.88611	6	25.65	7.91667	4.78333	65.36	23.9125	7.0375	3.48333	70.5575	7.125	4	23.1	6.68333	2.9	81.98	1	25.65	8.05	4.86667	72.4	22.8167	6.86667	4.86667	75.88	21.8967	7.03333	2.47	65.804	9.13667	5	1	1	5	0.230634
19	14.1562	L	L	0	1	3	-1.96853	-1.92434	-1.81901	23.3278	7.04167	3.19167	90.3567	7.71389	6	25.8667	7.96667	4.91667	90.16	24.6458	7.39167	4.03333	89.8175	6.74583	4	23.2667	7.16667	3.225	85.79	2	25.9167	7.98333	4.96667	83.79	23.25	6.85	4.96667	88.16	24.63	7.95	4.30333	87.704	7.32	5	1	1	5	0.962152
20	14.2164	L	L	0	1	3	-2.41413	-3.21158	-2.01807	23.2333	6.91944	3.08611	94.2017	7.68611	6	25.8	7.96667	4.88333	95.95	24.6056	7.32778	3.97222	95.22	6.72222	3	23.35	6.975	3.16667	92.02	2	25.9833	7.96667	4.98333	92.2	23.8667	6.96667	4.98333	93.66	24.6533	9.92667	5.3	89.488	9.27333	5	2	1	5	1.81784
21	17.2493	L	E	1	1	3	-2.57947	-1.98529	-3.4021	24.2083	8.23056	4.225	90.235	8.02222	6	26.1833	7.51667	4.86667	98.13	24.0625	6.97083	3.525	97.2125	6.90833	4	24.65	6.975	3.81667	97.365	2	25.95	7.88333	4.93333	96.91	23.1833	8.33333	4.93333	96.72	22.1567	6.98	2.57667	92.074	8.82333	5	2	1	3	0.825705
22	15.4575	L	L	0	0	2	-3.45981	#NULL!	#NULL!	25.6194	6.99722	4.31667	97.215	5.37778	6	#NULL!	#NULL!	#NULL!	#NULL!	#NULL!	#NULL!	#NULL!	#NULL!	#NULL!	#NULL!	#NULL!	#NULL!	#NULL!	#NULL!	#NULL!	#NULL!	#NULL!	#NULL!	#NULL!	#NULL!	#NULL!	#NULL!	#NULL!	#NULL!	#NULL!	#NULL!	#NULL!	#NULL!	#NULL!	2	1	3	#NULL!
23	15.7425	O		#NULL!	0	1	2.21379	#NULL!	#NULL!	#NULL!	#NULL!	#NULL!	#NULL!	#NULL!	#NULL!	#NULL!	#NULL!	#NULL!	#NULL!	#NULL!	#NULL!	#NULL!	#NULL!	#NULL!	#NULL!	#NULL!	#NULL!	#NULL!	#NULL!	#NULL!	#NULL!	#NULL!	#NULL!	#NULL!	#NULL!	#NULL!	#NULL!	#NULL!	#NULL!	#NULL!	#NULL!	#NULL!	#NULL!	#NULL!	2	1	3	#NULL!
24	15.4	O	E	0	1	3	-1.73256	-1.63919	-2.68042	25.8667	9.46111	5.66944	90.6367	7.59444	6	27.9333	9.6	6.76667	98.24	25.0042	8.1125	4.56667	92.27	7.10833	4	25.7917	10.7417	6.26667	87.825	2	27.3667	9.06667	6.23333	89.47	25.2667	8.5	6.23333	89.63	23.25	6.96667	3.11667	90.992	7.71667	5	1	1	5	1.60491
25	15.0712	O	E	0	0	2	1.77923	-4.5	#NULL!	27.1639	10.8722	7.02778	86.8433	7.70833	6	28.35	9.58333	6.98333	88.14	#NULL!	#NULL!	#NULL!	#NULL!	#NULL!	#NULL!	#NULL!	#NULL!	#NULL!	#NULL!	#NULL!	#NULL!	#NULL!	#NULL!	#NULL!	#NULL!	#NULL!	#NULL!	#NULL!	#NULL!	#NULL!	#NULL!	#NULL!	#NULL!	#NULL!	1	1	3	#NULL!
26	#NULL!			#NULL!	#NULL!	#NULL!	#NULL!	#NULL!	#NULL!	#NULL!	#NULL!	#NULL!	#NULL!	#NULL!	#NULL!	#NULL!	#NULL!	#NULL!	#NULL!	#NULL!	#NULL!	#NULL!	#NULL!	#NULL!	#NULL!	#NULL!	#NULL!	#NULL!	#NULL!	#NULL!	#NULL!	#NULL!	#NULL!	#NULL!	#NULL!	#NULL!	#NULL!	#NULL!	#NULL!	#NULL!	#NULL!	#NULL!	#NULL!	#NULL!	#NULL!	#NULL!	#NULL!	#NULL!
27	15.2329	O	L	1	1	3	-0.798415	-1.20301	-0.979374	24.925	8.31111	4.62222	95.455	7.38611	6	27.35	9.41667	6.38333	95.33	24.875	7	3.94583	95.575	6.125	4	24.6083	8.15833	4.38333	95.53	2	27.1667	7.35	5.26667	93.63	24.8333	8.76667	5.26667	93.91	24.8367	9.65333	5.25333	94.482	8.81667	5	1	1	5	0.812069
28	16.5452	L	E	1	1	3	-2.68306	-3.4533	#NULL!	23.3861	7.08333	3.24444	86.0267	7.69722	6	25.7167	7.43333	4.58333	90.67	24.5833	7.325	3.96667	89.38	6.74167	4	24.3417	4.51667	2.44167	89.375	2	25.4333	8.06667	4.75	93.72	23.2	7.55	4.75	86.03	23.7333	7.06667	3.40667	87.674	7.33333	5	1	1	5	#NULL!
29	14.863	O		#NULL!	0	1	2.39245	#NULL!	#NULL!	28.1667	8.80833	6.49444	93.0833	4.64167	6	#NULL!	#NULL!	#NULL!	#NULL!	#NULL!	#NULL!	#NULL!	#NULL!	#NULL!	#NULL!	#NULL!	#NULL!	#NULL!	#NULL!	#NULL!	#NULL!	#NULL!	#NULL!	#NULL!	#NULL!	#NULL!	#NULL!	#NULL!	#NULL!	#NULL!	#NULL!	#NULL!	#NULL!	#NULL!	2	1	3	#NULL!
30	16.0521	O	L	1	1	3	-0.475904	-0.430556	0.0430769	24.9694	8.88333	4.93333	93.4967	7.91389	6	27.75	8.86667	6.31667	95.44	24.7042	7.07083	3.89583	92.5025	6.36667	4	24.9917	8.51667	4.75833	96.35	2	27.2667	8.96667	6.13333	97.37	24.65	8.65	6.13333	89.17	25.4867	9.95333	5.72667	86.884	8.46667	5	2	1	5	0.274353
31	15.4932	L	E	1	1	3	-0.0913462	-2.7075	-2.95487	24.6389	8.34722	4.50556	96.2917	7.70833	6	25.8	7.96667	4.88333	97.84	24.9167	6.97083	3.95	97.3875	6.05417	4	23.6917	6.96667	3.33333	95.565	2	25.8167	7.96667	4.9	99.19	23.4333	7.08333	4.9	94.77	22.3867	6.97333	2.68667	95.642	8.58667	5	2	0	7	1.04463
32	18.7699	L	L	0	1	3	1.5	1.5	1.5	23.6417	7.1	3.38056	94.0783	7.45833	6	26.15	8.93333	5.55	94.1	24.8167	7.55417	4.19583	93.8475	6.7375	4	22.9667	7.06667	3.01667	90.15	2	25.9833	7.9	4.95	98.02	22.75	7.95	4.95	92.03	24.6533	9.62667	5.15333	87.356	8.97333	5	2	1	5	1.77278
33	16.9973	O	E	0	1	3	-2.30469	-2.83845	#NULL!	24.7639	8.59444	4.68333	95.7133	7.83056	6	27.0333	9.61667	6.33333	96.95	24.7417	7.06667	3.9125	94.695	6.325	4	24.7167	8.51667	4.61667	92.09	1	26.95	8.98333	5.98333	96.96	24.6333	8.48333	5.98333	94.27	21.7467	7.02	2.39333	95.04	9.27333	5	1	1	5	#NULL!
34	15.9644	O	E	0	1	3	-2.07	-1.85204	-3.15359	24.6611	8.52222	4.60278	96.3683	7.86111	6	27.0833	9.41667	6.26667	98.16	24.7375	7.925	4.3375	97.12	7.1875	4	24.7667	8.45833	4.61667	95.655	2	27.15	9.46667	6.31667	96.04	24.6333	8.46667	6.31667	95.53	21.7533	7.25	2.51	95.038	9.49667	5	2	1	5	1.00918
35	14.5671	O	L	1	1	3	-0.980392	-1.67516	-0.112415	26.6667	10.1556	6.41944	89.6333	7.48889	6	26.8333	9.46667	6.15	92.46	26.1792	6.9875	4.5875	92.3425	4.80833	4	26.7583	9.975	6.375	91.84	2	26.9	9.3	6.11667	92.71	27.2833	9.78333	6.11667	94.36	25.77	9.96667	5.87333	91.744	8.19667	5	1	1	5	1.41409
36	17.7945	O		#NULL!	0	1	#NULL!	#NULL!	#NULL!	27.6083	9.75417	6.69167	68.0975	6.14583	4	#NULL!	#NULL!	#NULL!	#NULL!	#NULL!	#NULL!	#NULL!	#NULL!	#NULL!	#NULL!	#NULL!	#NULL!	#NULL!	#NULL!	#NULL!	#NULL!	#NULL!	#NULL!	#NULL!	#NULL!	#NULL!	#NULL!	#NULL!	#NULL!	#NULL!	#NULL!	#NULL!	#NULL!	#NULL!	1	1	3	#NULL!
37	16.4658	L	E	1	1	3	-1.996	-3.01813	-4.31735	23.4778	7.35833	3.42778	88.5167	7.88056	6	26.8167	7.96667	5.4	92.88	24.725	7.00417	3.875	93.91	6.27917	4	23.1	6.975	3.04167	92.38	2	26.55	7.96667	5.26667	88.31	21.8667	6.96667	5.26667	90.48	22.1533	6.97333	2.57333	89.054	8.82	5	2	1	5	1.4669
38	14.7479	L	L	0	1	3	-2.98326	-2.54545	-1.20087	23.0556	7.41667	3.24167	93.3867	8.36111	6	26.1333	7.95	5.05	95.99	24.2833	7.1	3.7	93.995	6.81667	4	23.0417	8.125	3.59167	91.56	2	25.5667	7.96667	4.76667	93.23	23.4167	6.93333	4.76667	97.12	24.8267	9.93333	5.38667	91.986	9.10667	5	2	1	5	0.362617
39	14.1014	O	E	0	1	3	-0.742599	-1.38959	-4.5	25.8278	9.46111	5.65	93.0067	7.63333	6	27.85	9.38333	6.61667	95.48	24.7917	6.97083	3.8875	92.3575	6.17917	4	25.2583	8.46667	4.875	95.125	2	#NULL!	#NULL!	#NULL!	#NULL!	25.5833	9.46667	#NULL!	97.67	23.1633	6.99667	3.09333	90.122	7.83333	5	2	1	5	1.20073
40	17.0055	O	L	1	0	2	-0.133358	#NULL!	#NULL!	24.3222	6.89444	3.61944	82.02	6.57222	6	26.55	7.96667	5.26667	88.31	21.9042	6.975	2.45417	89.085	9.07083	4	22.5083	6.96667	2.74167	89.705	2	#NULL!	#NULL!	#NULL!	#NULL!	#NULL!	#NULL!	#NULL!	#NULL!	#NULL!	#NULL!	#NULL!	#NULL!	#NULL!	#NULL!	1	1	5	#NULL!
41	15.1178	O	E	0	1	3	-1.24561	-0.9718	-1.13824	25.4861	9.88611	5.69722	96.6983	8.4	6	27.15	9.46667	6.31667	95.78	24.9375	7.05	4	97.3075	6.1125	4	25.3917	8.975	5.19167	96.64	2	27.4833	9.46667	6.48333	97.77	24.85	8.96667	6.48333	98.36	23.3	6.92333	3.11667	95.788	7.62333	5	2	1	5	2.68793
42	15.7479	L	L	0	1	3	-4.22899	-4.31772	-3.17146	22.2722	5.95278	2.12222	98.1967	7.68056	6	26.2	7.96667	5.08333	96.53	24.6292	6.95833	3.80417	97.74	6.32917	4	22.0917	5.93333	2.025	97.555	2	26.2333	7.91667	5.08333	96.48	23.0167	6.96667	5.08333	98.74	24.91	9.24	5.08667	93.598	8.33	5	2	1	5	1.90691
43	15.926	L	L	0	1	3	-1.73645	-1.63429	0.143333	23.3528	7.45278	3.41389	90.755	8.1	6	25.8667	7.96667	4.93333	92.9	24.6625	7.57083	4.125	90.76	6.90833	4	23.65	7.99167	3.83333	90.53	2	25.7833	8.5	5.15	95.26	22.8333	7.96667	5.15	93.25	24.75	10.1933	5.48	92.436	9.44333	5	2	1	5	0.186332
44	15.0027	L	E	1	1	3	-3.38023	-2.60092	-3.60253	23.2278	6.95	3.1	88.345	7.72222	6	25.7167	7.9	4.81667	81.13	24.7583	7.11667	3.94167	90.835	6.35833	2	23.4083	6.90833	3.16667	89.67	2	25.55	8.03333	4.8	91.99	23.1667	7.16667	4.8	90.21	21.83	6.66333	2.25333	82.998	8.83333	5	1	1	5	0.624357
45	16.0329	L	E	1	0	2	-3.84702	#NULL!	#NULL!	23.1444	7.13056	3.15	92.945	7.98611	6	#NULL!	#NULL!	#NULL!	#NULL!	#NULL!	#NULL!	#NULL!	#NULL!	#NULL!	#NULL!	#NULL!	#NULL!	#NULL!	#NULL!	#NULL!	#NULL!	#NULL!	#NULL!	#NULL!	#NULL!	#NULL!	#NULL!	#NULL!	#NULL!	#NULL!	#NULL!	#NULL!	#NULL!	#NULL!	2	1	5	#NULL!
46	14.7781	O		#NULL!	0	1	3	#NULL!	#NULL!	28.35	11.7033	8.03	86.386	7.35333	5	#NULL!	#NULL!	#NULL!	#NULL!	#NULL!	#NULL!	#NULL!	#NULL!	#NULL!	#NULL!	#NULL!	#NULL!	#NULL!	#NULL!	#NULL!	#NULL!	#NULL!	#NULL!	#NULL!	#NULL!	#NULL!	#NULL!	#NULL!	#NULL!	#NULL!	#NULL!	#NULL!	#NULL!	#NULL!	1	1	6	#NULL!
47	18.8822	O		#NULL!	0	1	-0.892218	#NULL!	#NULL!	28.95	11.9417	8.45278	93.0033	6.99167	6	#NULL!	#NULL!	#NULL!	#NULL!	#NULL!	#NULL!	#NULL!	#NULL!	#NULL!	#NULL!	#NULL!	#NULL!	#NULL!	#NULL!	#NULL!	#NULL!	#NULL!	#NULL!	#NULL!	#NULL!	#NULL!	#NULL!	#NULL!	#NULL!	#NULL!	#NULL!	#NULL!	#NULL!	#NULL!	2	1	3	#NULL!
48	15.2685	O	L	1	1	3	-1.26606	-0.684298	-1.24447	24.6056	8.52778	4.575	94.1467	7.92222	6	27.35	9.46667	6.41667	93.46	24.7278	7.67778	4.21111	89.57	6.95	3	24.8333	8.46667	4.65	81.395	2	27.5	9.53333	6.51667	95.3	24.75	9.96667	6.51667	87.88	24.83	9.99333	5.42	83.982	9.16333	5	1	1	5	0.823412
49	14.8822	L	E	1	1	3	-2.85357	-2.41236	-4.20118	22.51	6.44	2.48	88.608	7.93	5	25.7167	8.7	5.21667	89.74	24.5708	7.1375	3.86667	91.27	6.56667	4	22.725	6.35	2.55	90.95	2	25.7833	7.96667	4.88333	98.65	21.7	7	4.88333	88.85	22.1533	6.71333	2.44	91.032	8.56	5	2	1	5	1.30761
50	16.389	O	L	1	1	3	-1.59786	-2.81027	-2.67763	25.6222	9.35556	5.49722	94.235	7.73333	6	#NULL!	#NULL!	#NULL!	#NULL!	25.6667	7.625	4.65417	95.31	5.95833	4	25.3667	9.21667	5.3	91.51	1	29	9.86667	7.45	98.97	24.5333	10.8833	7.45	97.26	25.5467	9.26	5.41667	93.838	7.71333	5	2	1	3	0.999217
51	18.5562	L	L	0	1	3	-2.81745	-2.87192	-1.95181	23.74	7.65667	3.70667	92.038	7.91667	5	25.55	6.96667	4.26667	90.71	23.9944	6.77778	3.4	76.2133	6.78333	3	23.8917	6.98333	3.45	80.18	2	25.9167	9.13333	5.53333	86.84	24.1167	8.65	5.53333	86.72	24.6833	8.67	4.68667	89.048	7.98667	5	1	1	5	0.11436
52	15.2274	L	E	1	1	3	-2.30751	-3.53067	-2.48027	23.8267	7.49667	3.66667	92.878	7.67	5	26.0167	8.18333	5.1	95.93	24.6917	7.18333	3.95	94.72	6.49167	4	23.5667	6.95	3.26667	94.32	2	26.2	8.05	5.13333	95.71	23.4333	7	5.13333	100	22.42	6.96333	2.69667	89.988	8.54333	5	1	1	5	0.797245
53	14.9671	O	E	0	1	3	-1.84	-2.3717	-2.4728	24.9528	8.175	4.57222	88.715	7.22222	6	27.5333	9.43333	6.48333	93.5	25.0375	7.25417	4.15417	94.3625	6.21667	4	24.8417	8.48333	4.675	87.42	2	27.5333	8.96667	6.25	94.48	25.5667	8.43333	6.25	95.15	23.0833	6.91	3.00667	87.932	7.82667	5	2	1	5	0.932752
54	15.8356	O	L	1	1	3	-0.493311	-1.21207	-0.882476	27.2806	10.4833	6.89167	70.65	7.20278	6	27.2667	8.96667	6.13333	79.41	25.6625	7.6875	4.68333	77.405	6.025	4	26.5167	10.35	6.44167	73.675	2	28.0167	9.51667	6.76667	89.6	27.1667	9.93333	6.76667	87.19	25.49	10.5533	6.03333	84.26	9.06333	5	1	1	3	0.469169
55	15.0986	O		#NULL!	0	1	0.555215	-0.249123	#NULL!	26.2733	10.25	6.27333	87.524	7.97667	5	27.8167	8.75	6.3	79.11	25.425	8.03333	4.73333	89.0375	6.60833	4	25.9833	9.975	5.98333	84.85	2	#NULL!	#NULL!	#NULL!	#NULL!	#NULL!	#NULL!	#NULL!	#NULL!	#NULL!	#NULL!	#NULL!	#NULL!	#NULL!	#NULL!	2	1	5	#NULL!
56	15.4932	O	E	0	1	3	0.0598194	0.0201511	-2.61864	26.8917	10.4917	6.70278	90.0767	7.6	6	#NULL!	#NULL!	#NULL!	#NULL!	25.4375	7.27917	4.37083	93.0675	5.84167	4	26.2917	10.0333	6.175	93.425	2	27.3167	9.4	6.36667	94.79	26.6333	9.95	6.36667	93.85	22.9567	7.23333	3.10333	89.106	8.27667	5	1	1	5	0.920981
57	15.1863	O	L	1	1	3	-2.89928	-3.02312	-3.39852	24.8194	9.01667	4.92778	90.51	8.19722	6	27.5	9.85	6.68333	91.08	24.675	8.25	4.47083	91.145	7.575	4	26.0667	9.83333	5.95833	92.135	2	27.5	10.1667	6.85	92.68	24.2333	8.56667	6.85	86.6	24.5567	9.88	5.22667	90.206	9.32333	5	2	999	5	0.798132
58	15.1397	O	E	0	1	3	-2.47	-1.96084	-2.95935	25.0667	9.025	5.05417	91.2575	7.95833	4	#NULL!	#NULL!	#NULL!	#NULL!	24.625	7.175	3.9125	95.7475	6.55	4	24.5667	8.425	4.50833	95.025	2	27.3333	9.46667	6.4	94.57	21.8667	7.06667	6.4	92.21	22.1033	6.92667	2.52333	92.116	8.82333	5	2	1	5	2.04148
59	15.0932	L		#NULL!	0	1	-1.87	#NULL!	#NULL!	23.3472	7.21667	3.28889	82.96	7.86944	6	#NULL!	#NULL!	#NULL!	#NULL!	#NULL!	#NULL!	#NULL!	#NULL!	#NULL!	#NULL!	#NULL!	#NULL!	#NULL!	#NULL!	#NULL!	#NULL!	#NULL!	#NULL!	#NULL!	#NULL!	#NULL!	#NULL!	#NULL!	#NULL!	#NULL!	#NULL!	#NULL!	#NULL!	#NULL!	1	1	5	#NULL!
60	17.4877	L	L	0	1	3	-2.75619	-2.82033	-2.16118	23.2306	6.46944	2.85833	95.22	7.23889	6	25.9	7.46667	4.7	94.29	24.7278	7.08333	3.91111	95.8967	6.35556	3	23.0333	6.675	2.85833	94.285	2	25.8833	7.8	4.85	97.46	22.6833	6.36667	4.85	92.14	24.7967	8.94	4.87667	90.608	8.14333	5	1	1	5	1.42333
61	17.474	L	L	0	1	3	-2.48601	-2.45161	-0.41116	22.6833	6.58611	2.64167	84.5233	7.90278	6	26	7.96667	4.98333	89.3	24.5833	6.96667	3.78333	85.7933	6.38333	3	22.7583	7.25833	3.01667	88.25	2	26.3333	7.31667	4.83333	79.26	22.5333	6.5	4.83333	87.63	25.2708	9.29583	5.29167	84.0225	8.025	4	2	1	5	0.575146
62	16.263	L	E	1	1	3	-2.85897	-2.90843	-2.99067	24.3444	7.35	3.85833	94.7683	7.00556	6	26.0667	7.65	4.86667	88.06	24.3722	6.95	3.66667	96.9467	6.57778	3	23.95	7.2	3.58333	95.12	2	27.3	7.96667	5.63333	92.86	24.2	7.66667	5.63333	95.54	22.1967	7.10667	2.66	98.522	8.91	5	1	1	5	1.06664
63	17.737	O	L	1	1	3	-0.846296	-1.31591	-0.616013	26.0972	9.73611	5.92778	93.5117	7.63889	6	27.0667	9.63333	6.36667	97.21	24.85	7.15417	4.0125	93.765	6.30417	4	25.7167	9.625	5.675	94.67	2	27.6333	9.6	6.61667	95.25	26.1333	9.46667	6.61667	92.05	24.9567	10.09	5.53667	93.01	9.13333	5	2	1	3	0.621394
64	15.9288	O	E	0	1	3	2.14496	1.15	1.39642	26.7222	10.1111	6.42778	88.6183	7.38889	6	28.45	9	6.73333	89.67	25.8292	7.99167	4.92083	90.275	6.1625	4	27.3833	10.4167	6.9	93	2	29.3167	9.48333	7.4	95.6	27.1167	10.0667	7.4	92.81	23.4333	7.22	3.32667	83.36	7.78667	5	1	1	5	2.35257
65	15.3425	O	L	1	1	3	-2.38	-2.07353	-0.85177	25.27	9.19	5.23667	94.196	7.92	5	#NULL!	#NULL!	#NULL!	#NULL!	24.5125	7.37917	3.95417	92.17	6.86667	4	25.4	8.95833	5.18333	95.485	2	27.5333	10.2667	6.91667	93.81	25.9333	9.01667	6.91667	92.47	25.1433	9.84333	5.50333	89.466	8.7	5	2	0	5	1.26156
66	14.2082	L	E	1	1	3	-2.92476	-3.66014	-2.92	22.9833	6.95333	2.97333	91.978	7.97	5	26.0667	7.6	4.85	95.78	24.6208	7.15	3.89167	92.605	6.52917	4	23.0833	6.89167	2.99167	90.485	2	26.3167	7.96667	5.15	91.74	23.2	6.95	5.15	94.19	21.6833	6.87917	2.2875	89.1975	9.19583	4	2	0	5	0.690595
67	16.7781	L	L	0	1	3	-1.78889	-2.52451	-3.02016	24.325	7.03333	3.68611	72.25	6.70833	6	28.1167	7.95	6.03333	65.94	26.6944	6.87222	4.79444	78.33	4.17778	3	23.8667	6.75833	3.31667	63.165	2	#NULL!	#NULL!	#NULL!	#NULL!	24.65	5.58333	#NULL!	73.9	25.7167	8.38333	5.05833	70.475	6.66667	2	1	1	3	2.60349
68	15.1096	L	E	1	1	3	1.5	-2.05149	1.5	25.0944	6.99167	4.05278	49.92	5.89722	6	27.3	7.85	5.58333	62.13	27.0208	6.925	4.98333	73.33	3.90417	4	25.6167	6.975	4.3	53.88	2	27.1	7.88333	5.5	54.48	28.45	7.13333	5.5	31.68	22.7233	7.14667	2.94333	35.184	8.42333	5	1	1	3	1.10944
69	18.9288	L	E	1	1	3	-2.12	-2.31	-1.93	22.1194	5.55	1.83889	91.6417	7.43056	6	25.9333	7.96667	4.96667	95.3	24.5667	6.58333	3.58333	94.9375	6.01667	4	23.1333	6.06667	2.60833	93.67	2	26.2333	7.85	5.05	92.58	21.8833	5.46667	5.05	92.75	22.15	6.91	2.54	88.924	8.76	5	1	1	2	0.511111
70	15.0822	O	L	1	1	3	-2.71589	-3.80455	-3.12371	25.4278	8.675	5.06389	90.6583	7.24722	6	27.6333	11.05	7.35	88.09	24.5917	7.95833	4.2875	86.3375	7.36667	4	24.9833	8.89167	4.94167	88.835	2	27.3333	9.23333	6.3	93.77	25.45	9.01667	6.3	84.36	24.96	9.32333	5.15	84.792	8.36333	5	2	1	6	0.493935
71	14.5507	O	E	0	1	3	0.739071	0.976182	1.92347	26.8133	11.1	6.96667	79.488	8.28667	5	27.5167	8.96667	6.25	92.66	25.3125	6.9625	4.14583	86.9575	5.65	4	26.5083	9.41667	5.975	89.6	2	27.3	12.4333	7.88333	89.23	25.2333	7.01667	7.88333	91.93	25.2667	7.80417	4.54583	84.1525	6.5375	4	1	1	5	3.60523
72	18.6411	O		#NULL!	0	1	3	#NULL!	#NULL!	26.2611	10.1833	6.23333	84.9683	7.92222	6	28.75	9.16667	6.96667	88.26	26.7056	8.73889	5.72778	72.49	6.03333	3	26.2583	9.89167	6.08333	76.995	2	#NULL!	#NULL!	#NULL!	#NULL!	#NULL!	#NULL!	#NULL!	#NULL!	#NULL!	#NULL!	#NULL!	#NULL!	#NULL!	#NULL!	1	1	3	#NULL!
73	16.4356	L	L	0	1	3	-3.83488	-3.31136	-2.73173	23.3767	7.03	3.21	85.75	7.65333	5	26.3	8.05	5.18333	89.86	24.775	7.23333	4.00833	92.835	6.45833	4	23.4167	6.825	3.13333	89.195	2	25.7333	7.96667	4.85	92.25	23.1	7.16667	4.85	90.89	24.9233	9.18	5.05333	90.38	8.25667	5	2	1	5	0.740179
74	14.8055	L	E	1	1	3	-3.89323	-3.96219	-3.81218	23.3806	7	3.2	88.4667	7.61944	6	26.1833	8.06667	5.13333	90.93	24.5222	6.93889	3.73889	92.7333	6.41667	3	22.2	7.06667	2.63333	88.72	1	26.4833	8.01667	5.26667	83.43	#NULL!	#NULL!	5.26667	#NULL!	22.4933	7.03333	2.77333	85.598	8.54	5	1	1	5	0.507713
75	15.9671	L	L	0	1	3	-3.39146	-3.96216	-3.04808	23.0917	6.84722	2.98056	92.9683	7.75556	6	25.7667	7.96667	4.88333	96.77	24.5375	6.96667	3.75833	94.945	6.42917	4	23.225	6.96667	3.1	93.125	2	25.8833	7.96667	4.93333	98.63	23.1333	6.85	4.93333	87.04	24.6	8.99333	4.80667	89.984	8.39333	5	1	1	5	1.48274
76	17.674	O	E	0	1	3	-1.07362	-1.47761	-2.52941	26.1028	9.40556	5.76111	83.7467	7.30278	6	27.1833	9.23333	6.21667	88.71	24.7542	6.98333	3.87917	92.75	6.22917	4	25.7333	9.2	5.475	87.055	2	27.05	9.43333	6.25	75.72	25.65	9.4	6.25	80.22	22.09	6.94333	2.52333	71.922	8.85333	5	1	1	5	1.78199
77	14.4712	O		#NULL!	0	1	-2.39749	#NULL!	#NULL!	25.5	7.41667	4.47083	82.9975	5.91667	4	#NULL!	#NULL!	#NULL!	#NULL!	#NULL!	#NULL!	#NULL!	#NULL!	#NULL!	#NULL!	#NULL!	#NULL!	#NULL!	#NULL!	#NULL!	#NULL!	#NULL!	#NULL!	#NULL!	#NULL!	#NULL!	#NULL!	#NULL!	#NULL!	#NULL!	#NULL!	#NULL!	#NULL!	#NULL!	1	1	3	#NULL!
78	16.411	L		#NULL!	0	1	-2.93	#NULL!	#NULL!	22.2111	5.93611	2.08333	94.4667	7.725	6	#NULL!	#NULL!	#NULL!	#NULL!	#NULL!	#NULL!	#NULL!	#NULL!	#NULL!	#NULL!	#NULL!	#NULL!	#NULL!	#NULL!	#NULL!	#NULL!	#NULL!	#NULL!	#NULL!	#NULL!	#NULL!	#NULL!	#NULL!	#NULL!	#NULL!	#NULL!	#NULL!	#NULL!	#NULL!	2	1	5	#NULL!
79	14.8164	L		#NULL!	0	1	-3.39	#NULL!	#NULL!	23.2	6.80833	3.01111	87.345	7.60833	6	#NULL!	#NULL!	#NULL!	#NULL!	#NULL!	#NULL!	#NULL!	#NULL!	#NULL!	#NULL!	#NULL!	#NULL!	#NULL!	#NULL!	#NULL!	#NULL!	#NULL!	#NULL!	#NULL!	#NULL!	#NULL!	#NULL!	#NULL!	#NULL!	#NULL!	#NULL!	#NULL!	#NULL!	#NULL!	1	1	5	#NULL!
80	14.474	L	L	0	1	3	-3.26697	-2.99408	-1.7236	23.5028	6.67222	3.09444	62.9533	7.16944	6	25.85	7.95	4.9	73.42	25.3833	6.93333	4.16111	74.2733	5.55	3	25.625	6.93333	4.29167	82.755	2	25.5833	8.73333	5.16667	74.36	#NULL!	#NULL!	5.16667	#NULL!	26.59	8.71333	5.65667	74.108	6.12333	5	1	1	3	1.01886
81	15.6849	L	L	0	1	3	-3.19	-2.81516	-3.20574	23.225	6.80833	3.02778	77.3033	7.58333	6	26.75	7.96667	5.36667	84.57	24.5458	7.02083	3.79167	80.1725	6.475	4	22.9417	7.09167	3.025	82.735	2	26.9167	7.86667	5.4	85.52	23.1833	7.75	5.4	85.19	24.1433	7.94333	4.05	83.352	7.8	5	2	999	3	1.03796
82	16.8493	O	E	0	1	3	1.14251	-0.680297	-2.13107	26.7	10.075	6.39722	66.5467	7.375	6	27.5	9.51667	6.51667	75.9	24.9792	7.15833	4.07917	75.0025	6.17917	4	26.4833	10.1667	6.33333	58.26	1	27.65	9.46667	6.56667	64.18	26.5833	10.3333	6.56667	60.22	22.1667	6.89	2.53333	67.53	8.72333	5	1	1	5	0.590309
83	15.1178	O	L	1	1	3	0.803779	-2.19158	-1.06193	#NULL!	#NULL!	#NULL!	#NULL!	#NULL!	0	27.9333	8.65	6.3	97.53	24.7125	7.45417	4.09583	96.89	6.74167	4	25.7583	8.90833	5.33333	98.055	2	27.4167	10.4833	6.95	98.11	24.8333	10.25	6.95	96.1	25.1567	10.0133	5.6	90.61	8.85667	5	2	1	5	#NULL!
